# Supplementary material for: Establishment and verification of a nomogram model based on the inflammatory indicators of patients with cervical cancer for predicting the risk of their lymph node metastasis
Source: PeerJ. 2025 Sep 25;13:e20069. doi: 10.7717/peerj.20069 (PMC12476862; doi:10.7717/peerj.20069)
Supplement: Supplemental Information 1 [file peerj-13-20069-s001.xlsx]

## Sheet: Sheet1
group(LNM)	age	BMI	期别	albumin	neutrophil count	lymphocyte count	monocyte count	platelet count	SCC-Ag	fibrinogen	D-Dimer	diabetes	hypertension	LVSI	Ki67水平
0	37	35.84	1B2	40.4	5.11	2.4	0.38	393	33.43	4.75	1.07	0	0	0
0	60	25.91	1B2	48	3.05	1.76	0.24	228	2.128	2.46	0.12	0	0	1	0.8
0	53	28.35	1B2	41.7	2.19	2.54	0.27	247	4.611	2.21	0.44	0	0	0	0.5
0	61	26.71	ⅡA1	43.8	2.93	1.65	0.22	223	2.984	3.39	0.36	0	0	1	0.2
0	65	20.28	ⅡA1	47	5.73	3.05	0.35	186	3.921	3.13	0.16	0	0	0	0.8
0	31	24.58	ⅡA2	40.7	11.85	1.31	0.72	340	4.811	2.49	0.36	0	0	0
0	51	25.39	IA1	43.5	4.35	1.11	0.32	254	0.931	3.12	0.28	0	0	0
0	56	22.22	IA2	38.1	2.95	1.48	0.26	194	0.593	2.27	0.13	0	0	0
0	78	22.35	IA2	43.7	4.11	1.81	0.29	227	1.286	3.06	1.01	1	1	0	0.6
0	65	32.28	IA2	43.5	2.5	1.63	0.23	160	5.036	2.81	0.14	0	0	0
0	33	20.83	IA2	44.7	5.83	1.71	0.21	267	0.627	3.04	0.15	0	0	0
0	45	28.98	IA2	46	4.26	2.67	0.28	277	0.877	2.38	0.43	0	1	0
0	56	24.61	IA2	40.7	4.78	1.13	0.22	230	1.122	2.96	0.19	0	0	0	0.4
0	52	22.04	IA2	41.8	8.36	0.82	0.25	322	0.98	3.58	1.03	0	0	0
0	49	28.91	IA2	37.6	4.23	1.23	0.38	271	0.93	1.85	0.13	0	0	0
0	37	27.34	IA2	42.8	4.31	1.61	0.29	227	0.552	1.9	0.65	0	1	0
0	36	26.57	IA2	36.36	2.34	1.08	0.18	240	0.883	2.41	16.8	0	0	0
0	51	23.42	IA2	41.6	2.04	1.44	0.15	321	0.767	1.88	0.1	0	0	1
0	72	20.46	IA2	40.5	4.9	1.72	0.5	195	2.17	4.56	0.46	0	1	1	0.4
0	51	25	IA2	42.5	2.84	0.78	0.16	282	1.106	2.94	0.47	0	0	0
0	51	31.25	IA2	37.5	3.38	1.99	0.26	153	3.569	2.6	0.15	0	1	1	0.5
0	34	26.95	IB	39	5.78	2.29	0.28	295	1.414	3.25	0.13	0	1	0	0.8
0	61	24.13	IB	39.2	1.85	1.46	0.17	140	1.005	2.56	0.18	0	0	1	0.75
0	62	18.37	IB1	32.6	6.82	1.19	0.43	214	1.968	3.26	1.6	0	1	0	0.8
0	50	26.69	IB1	42	2.87	1.22	0.29	342	0.897	2.42	0.14	0	1	0
0	53	25	IB1	42.5	2.61	1.32	0.24	140	0.842	2.8	0.16	0	0	0	0.8
0	57	23.44	IB1	41.2	4.26	2.37	0.31	233	1.987	2.99	0.23	0	1	0
0	55	27.59	IB1	41.6	4.11	1.65	0.29	232	1.54	2.46	0.21	0	0	0
0	54	27.73	IB1	44.2	2.01	1.84	0.22	238	0.858	2.26	0.23	0	0	0	0.6
0	35	26.16	IB1	40.8	5.27	1.62	0.44	248	2.43	3.08	0.31	0	0	0
0	36	21.63	IB1	45.7	2.07	1.19	0.16	296	2.094	1.92	0.44	0	0	1	0.7
0	65	22.63	IB1	33.8	5.24	0.82	0.35	186	10.82	3.59	0.14	0	0	1
0	56	21.9	IB1	44.1	5.16	2	0.28	273	1.49	3.24	0.31	0	0	0
0	36	21.45	IB1	47.2	2.2	1.63	0.25	258	1.235	2.04	0.15	0	0	0
0	39	24.17	IB1	41.4	6.65	1.77	0.47	252	2.585	3.24	0.36	0	0	0	0.8
0	38	22.84	IB1	44.7	2.78	1.03	0.2	246	1.544	3.12	0.74	0	0	1	0.4
0	54	28.91	IB1	39.6	3.12	2.25	0.25	242	1.23	2.41	0.14	0	0	0	0.5
0	39	14.59	IB1	50.5	4.72	1.07	0.43	207	1.803	2.99	0.2	0	0	0	0.9
0	49	26.08	IB1	46.8	5.85	1.5	0.32	299	4.145	3.68	0.52	1	0	0	0.4
0	38	20.76	IB1	46.7	3.61	1.8	0.29	179	1.385	1.94	0.16	0	0	0
0	75	19.15	IB1	39.79	3.67	2.71	0.36	265	0.678	3.24	0.23	0	1	0
0	66	22.27	IB1	37	4.23	1.95	0.37	254	1.371	2.96	0.21	0	0	0
0	64	20.31	IB1	45.31	4.78	1.4	0.27	154	1.046	2.72	0.14	1	0	1	0.5
0	50	23.44	IB1	41	4.37	2.69	0.35	225	0.922	3.16	0.14	0	0	0
0	43	31.73	IB1	42.5	5	2.27	0.35	289	1.795	2.85	2.85	1	0	0
0	57	27.9	IB1	38.5	2.92	1.82	0.26	260	1.837	1.97	0.13	0	0	0	0.7
0	72	29.3	IB1	33.9	3.69	1.58	0.3	185	1.274	2.25	0.19	0	1	0
0	34	23.44	IB1	48.64	3.56	1.62	0.23	290	2.316	2.45	0.24	0	0	0	0.2
0	41	24.62	IB1	45.6	5.22	1.86	0.28	349	1.884	2.39	0.16	0	0	1
0	70	24.75	IB1	42.7	3.79	1.78	0.18	247	1.851	2.79	0.74	0	1	0	0.4
0	49	24.61	IB1	54.9	3.38	2.12	0.25	189	1.2	2.49	1.3	1	0	1	0.7
0	57	24.34	IB1	37.07	5.42	1.12	0.33	227	4.853	2.48	0.34	0	0	1
0	60	26.06	IB1	39.8	3.61	1.94	0.48	262	9.449	3	0.57	0	0	1
0	65	19.39	IB1	43.5	7.18	1.09	0.46	266	6.305	3.24	0.21	0	0	0	0.4
0	40	20.57	IB1	45.8	4.71	1.32	0.26	230	0.98	2.82	1.03	0	0	1
0	55	24.03	IB1	39	1.2	1.19	0.16	205	2.422	3.79	0.12	0	0	1	0.2
0	40	22.14	IB1	42.5	3.47	1.52	0.21	297	2.217	2.1	0.26	0	0	1	0.7
0	57	28.75	IB1	43.8	3.29	1.93	0.46	333	0.978	3.32	0.12	0	0	0	0.7
0	59	24.25	IB1	38.9	3.1	1.51	0.25	193	5.974	3.16	0.27	1	0	1
0	65	21.93	IB1	40.73	2.06	1.58	0.27	185	4.974	2.59	0.26	0	0	1
0	51	23.83	IB1	47.4	1.56	1.62	0.14	202	2.331	2.92	0.65	0	0	0	0.8
0	39	22.79	IB1	42.3	5.16	1.7	0.28	240	4.161	3.28	0.29	0	0	1	0.75
0	58	26.95	IB1	39.3	5.57	2.01	0.5	253	0.766	4.23	0.44	0	1	1
0	45	19.98	IB1	43.6	3.6	2.24	0.3	303	1.184	2.11	0.38	0	0	0	0.5
0	38	25.56	IB1	43.2	4.87	2.22	0.28	246	1.23	2.36	0.38	0	0	1	0.8
0	48	25.34	IB1	47.7	4.85	1.24	0.15	267	1.3	2.76	0.25	0	0	1	0.5
0	64	26.35	IB1	40.15	3.18	2.07	0.34	364	1.689	2.6	0.19	0	1	1	0.6
0	47	21.8	IB1	48.69	2.84	1.99	0.28	263	1.795	2.52	0.43	0	0	0
0	43	20.81	IB1	36.49	4.62	2.52	0.31	267	3.127	2.48	0.1	0	0	0	0.9
0	63	23.42	IB1	46.4	4.77	1.26	0.28	247	7.663	2.65	0.19	0	0	1	0.7
0	46	18.63	IB1	49.7	2.52	1.31	0.17	284	1.02	2.45	0.23	0	0	0	0.3
0	38	24.69	IB2	44.7	6.66	0.92	0.12	261	5.375	2.31	0.29	0	0	0	0.9
0	51	25.45	IB2	40.8	6.97	1.47	0.34	201	2.008	2.26	0.1	0	0	0	0.9
0	49	25.2	IB2	45.7	4.05	1.17	0.32	179	7.311	2.03	0.22	1	0	0	0.5
0	48	26.1	IB2	46.5	1.99	1.8	0.2	200	7.417	2.33	0.72	0	0	0	0.8
0	35	21.51	IB2	39.3	4.35	1.44	0.3	253	4.876	2.4	1.11	0	0	0	0.6
0	63	26.22	IB2	41.4	5.44	1.31	0.42	178	8.564	4.07	0.32	0	1	1	0.5
0	33	24.2	IB2	41.5	1.39	1.41	0.12	193	1.545	1.64	0.38	0	0	0	0.8
0	38	23.91	IB2	48.4	5.08	1.51	0.2	189	0.872	2.3	0.26	0	0	0	0.6
0	62	25.08	IB2	40.6	3.57	1.93	0.22	203	2.866	2.65	0.64	0	0	0	0.7
0	73	25.28	IB2	40	4.66	1.77	0.29	435	2.516	3.61	0.57	0	0	0
0	49	24.61	IB2	41.2	1.65	1.53	0.14	244	2.233	2.32	1.36	0	0	0
0	47	30.83	IB2	41.4	2.79	1.36	0.25	218	1.795	2.61	0.48	0	0	0	0.6
0	64	20.89	IB2	40.6	2.17	1.64	0.22	180	4.438	3.33	0.32	0	0	0	0.4
0	49	22.48	IB2	44	4.49	1.49	0.23	191	1.344	3.16	0.12	0	0	0	0.6
0	63	24.32	IB2	45.6	3.06	1.82	0.27	291	9.543	4.2	0.26	0	1	1	0.9
0	65	25.3	IB2	38.7	2.71	1.58	0.25	335	17.56	3.79	0.39	0	1	0	0.6
0	38	33.67	IB2	40.3	5.13	1.75	0.36	313	0.975	2.38	0.1	0	0	0	0.8
0	38	24.97	IB2	41.02	3.22	2.1	0.25	265	10.56	3.84	0.32	0	0	0	0.8
0	60	28.33	IB2	37.2	4.97	2.14	0.39	286	1.782	3.47	0.86	1	1	0	0.45
0	64	31.82	IB2	41.4	3.05	1.33	0.27	107	20.34	1.97	0.18	1	1	0	0.8
0	55	23.83	IB2	45.2	2.08	1.71	0.31	308	4.376	2.66	1.35	0	0	1	0.8
0	47	29.72	IB2	44.1	3.82	1.84	0.23	375	0.951	2.47	0.44	1	0	0	0.7
0	54	27.92	IB2	49.24	4.29	1.6	0.34	253	6.427	2.87	0.32	0	1	1
0	37	21.99	IB2	45.3	2.67	1.09	0.21	232	0.927	1.74	0.1	0	0	1	0.8
0	42	27.55	IB2	39.3	2.01	1.64	0.28	175	5.948	2.52	0.18	0	0	0	0.03
0	67	21.82	IB2	42.7	3.37	2.37	0.26	197	4.956	2.14	0.19	0	0	1	0.4
0	35	32.03	IB2	43.5	4.58	2.05	0.33	348	3.213	2.62	0.17	1	1	1
0	45	27.41	IB2	46.5	6.93	1.96	0.26	251	6.524	1.79	0.38	0	1	1	0.7
0	60	25.93	IB2	44.2	5.18	2.84	0.23	234	17.42	2.83	0.26	1	1	1	0.6
0	60	22.86	IB2	42.5	2.54	1.28	0.21	332	1.78	2.5	0.43	0	0	0
0	52	25.04	IB2	42	3.42	2.04	0.25	303	10.96	2.61	0.27	0	0	1	0.7
0	66	23.12	IB2	51.8	2.89	1.45	0.18	263	5.143	2.99	0.18	0	0	1	0.4
0	39	30.47	IB2	41.8	4.8	1.25	0.22	286	6.839	2.96	0.23	0	0	0	0.5
0	36	25.39	IB2	42.2	2.73	1.13	0.18	172	5.465	2.56	0.97	0	0	0	0.8
0	58	27.25	IB2	42.1	5.77	1.5	0.24	206	8.686	3.3	0.47	0	1	0	0.5
0	65	22.98	IB2	38.5	3.33	1.37	0.28	179	2.76	1.89	0.38	1	1	1	0.8
0	56	29.24	IB2	39.54	3.44	1.45	0.17	288	5.206	2.95	0.53	0	0	1	0.4
0	57	28.25	IB2	41.5	2.96	2.4	0.36	268	4.036	2.51	0.29	0	0	0	0.9
0	73	25.79	IB2	40	3.19	1.23	0.18	371	31.38	2.54	0.26	0	1	1	0.9
0	44	26.5	IB2	44.5	3.26	1.37	0.21	293	1.03	2.54	0.39	1	0	0	0.9
0	71	25.5	IB3	45	4.99	3.25	0.4	350	8.438	3.69	0.34	1	1	1	0.7
0	52	22.55	IB3	43.9	2.7	1.17	0.23	178	8.851	2.15	0.23	0	1	0	0.8
0	47	19.47	IB3	41.7	4.67	1.29	0.32	367	43.86	3.52	0.58	0	0	0
0	50	22.51	IB3	37.5	6.16	1.54	0.33	337	19.47	2.62	0.11	0	0	0	0.7
0	46	31.65	IB3	42.6	2.38	2.29	0.2	350	2.31	3.21	0.49	1	0	0	0.9
0	68	23.6	IB3	47	4.56	1.05	0.33	214	8.394	3.53	0.28	0	0	0	0.4
0	70	29.14	IB3	38	6.21	2.28	0.43	214	51.33	2.48	0.21	1	1	0
0	54	25.37	IB3	37.8	4.28	1.76	0.25	216	14.37	3.6	0.34	0	0	0	0.8
0	47	27.39	IB3	40.3	3.94	1.24	0.35	291	4.153	1.95	0.12	0	0	1
0	53	29.68	IB3	38.9	4.97	1.56	0.22	335	1.909	3.16	0.88	0	0	0	0.6
0	52	24.87	IB3	39.5	2.87	1.87	0.25	202	9.027	2.65	2.11	0	0	1	0.6
0	53	23.12	IB3	33.3	5.04	1.33	0.24	281	10.7	1.97	0.28	0	0	0	0.7
0	28	22.48	IB3	37.8	10.78	2.22	0.69	271	60.15	4.54	0.93	1	0	0	0.6
0	34	31.25	IB3	41.1	4.13	2.26	0.35	364	13	4.02	4.46	0	0	0	0.6
0	58	26.52	IB3	39.8	3.44	1.05	0.29	228	2.789	2.87	0.16	0	1	1	0.8
0	69	26.94	IB3	47.4	4.86	1.34	0.2	223	7.926	2.49	0.24	0	1	0
0	45	30.41	IB3	42.4	3.12	0.96	0.13	234	16.74	2.9	0.87	0	0	0	0.5
0	62	29.58	IB3	44.9	3.41	1.45	0.14	307	15	3.87	0.66	0	1	0	0.7
0	72	24.96	IIA	36.5	3.98	1.92	0.27	293	71.63	3.47	0.3	0	1	0
0	49	24.65	IIA	43	2.82	1.39	0.28	437	6.938	5.14	0.38	0	0	0	0.8
0	70	27.06	IIA1	36.1	2.35	1.18	0.19	147	16.32	2.05	0.18	1	1	1	0.7
0	45	19.95	IIA1	43.4	4.56	1.81	0.36	229	2.463	2.38	0.32	0	0	0
0	65	26.56	IIA1	45.7	5.08	2.42	0.31	272	15.24	2.27	0.18	1	0	1
0	63	29.57	IIA1	44.3	3	1.54	0.22	246	2.089	3.85	0.35	0	0	1	0.8
0	68	33.81	IIA1	36.7	3.32	1.72	0.31	318	5.631	2.42	0.94	0	1	0	0.8
0	62	21.36	IIA1	45.3	3.96	0.97	0.19	218	2.674	3.32	0.14	0	0	0	0.5
0	74	22.98	IIA1	39.4	4.63	2.12	0.37	229	2.855	2.73	0.52	0	1	1	0.8
0	68	26.78	IIA1	41.4	3.3	1.72	0.28	200	7.847	2.39	0.46	0	0	0	0.25
0	55	21.85	IIA1	44.5	2.71	1.72	0.19	266	5.267	2.99	0.11	0	0	1	0.7
0	39	28.65	IIA1	45	5.51	2.04	0.32	266	9.783	2.41	0.39	1	0	1	0.6
0	54	24.84	IIA1	46.6	5.29	1.58	0.27	286	1.865	3.21	0.12	0	1	0	0.35
0	59	26.36	IIA1	50	3.92	1.29	0.26	277	0.617	3.27	0.33	0	1	1	0.9
0	52	22.32	IIA1	43	3.2	1.96	0.3	182	4.842	3.06	0.15	0	0	1	0.7
0	55	28.05	IIA1	42.4	2.37	1.7	0.2	248	3.639	3.36	0.23	0	0	0	0.8
0	59	24.92	IIA1	41.3	1.1	0.5	0.15	97	1.035	3.65	0.43	0	0	1	0.55
0	60	29.71	IIA1	42.4	4.46	1.73	0.31	243	9.584	4.12	0.63	0	0	1	0.8
0	66	22.23	IIA2	41.7	4.63	2.29	0.41	197	7.518	3.71	0.3	0	0	1
0	53	25.71	IIA2	43.7	4.71	1.45	0.25	280	17.95	3.56	0.28	0	1	0
0	68	25.07	IIA2	43	4.84	2.09	0.33	176	3.166	3.27	0.14	1	0	1	0.7
0	55	26.64	IIA2	43.7	6	2.4	2.4	236	15.53	2.94	0.18	0	0	0	0.8
0	52	27.14	IIA2	42.7	4.25	2.16	0.3	312	4.209	2.64	0.12	1	0	1	0.6
0	53	25.64	IIA2	41.2	3.84	1.6	0.23	307	5.054	2.33	0.45	0	0	0
0	64	25.39	IIA2	44.01	6.68	1.82	0.41	248	11.77	2.6	0.53	0	1	1
0	59	23.74	IIA2	37.5	4.06	1.25	0.28	113	2.037	3.13	0.87	0	0	0	0.9
0	45	27.22	IIA2	36.45	4.48	1.52	0.31	227	6.723	35.92	1.31	0	0	0	0.2
0	58	28.97	IIA2	38.4	2.98	2.18	0.3	389	2.971	3.29	0.12	0	0	0	0.4
1	48	25.2	ⅡA1	33.87	5.16	1.34	0.41	366	6.462	2.4	0.34	0	0	0
1	55	27.39	IB	44.4	4.23	1.71	0.22	212	7.777	3.84	0.29	0	1	0
1	65	30.82	IB1	38.6	0.86	0.99	0.27	310	1.007	3.2	2.68	0	1	1	0.6
1	36	28.2	IB1	33.29	3.6	1.85	0.29	307	0.957	1.93	0.54	0	0	1
1	43	27.06	IB1	44.49	3.22	1.16	0.37	275	10.36	1.9	0.32	0	0	1
1	62	26.37	IB2	45.5	3.64	1.32	0.27	178	89.14	2.59	0.34	0	0	0	0.5
1	49	27.5	IB2	41.07	5.15	2.27	0.42	277	10.62	2.73	0.14	1	1	1	0.6
1	55	19.82	IIA1	42.4	3.05	0.58	0.1	273	5.744	3.47	0.22	0	0	0	0.8
1	60	22.03	IIA1	43.7	5.83	1.94	0.37	397	22.79	4.03	0.41	1	0	1	0.9
1	32	22.27	IIA1	46.1	6.22	2.2	0.35	270	62.54	2.45	0.68	0	0	1	0.5
1	65	25.89	IIA2	46.7	10.01	1.86	0.36	267	20.49	4.02	0.26	0	0	1	0.7
1	52	19.82	IIA2	47	8.46	1.19	0.26	231	5.731	2.26		0	0	1
1	31	18.19	IB2	45.6	3.58	1.87	0.31	237	35.49	2.54	0.6	0	0	0	0.8
1	41	35.93		45.1	1.82	1.52	0.14	323	2.136	2.44	0.25	0	0	1
1	48	28.76	IIA2	34.71	7.32	1.88	0.41	358	14.52	3.68	0.35	0	0	1	0.7
1	35	22.66	IIA	38.2	1.94	1.28	0.29	277	11.24	1.64	0.31	0	0	1	0.7
1	31	32.41	IIA	39.7	4.42	2.41	0.32	348	3.258	2.74	0.83	0	0	1	0.9
1	63	22.34		44.7	6.72	0.91	0.22	294	8.9	4.13	0.86	1	0	1	0.4
1	60	35.8		39.6	5.17	2.18	0.37	216	2.501	3.29	0.87	0	1	1
1	41	25.65		38.6	3.38	1.74	0.38	231	>100	2.29	0.36	0	0	1	0.7
1	52	23.34	IB	42.7	6.47	1.04	0.41	319	64.32	2.93	0.65	0	0	1	0.5
1	60	22.86	IIA2	38.4	2.5	1.38	0.25	404	>100	3.41	0.42	0	0	0	0.4
1	52	25.39	IB2	42.64	5.81	2.07	0.34	317	3.864	3.08	0.34	0	1	1
1	59	23.01	IB1	40.63	2.94	2.27	0.24	276	20.69	3.78	0.31	0	0	1	0.75
1	58	27.29		43.9	3.36	2	0.26	272	3.154	2.49	16.1	0	1	1	0.5
1	70	24.11	IB2	45.9	6.52	2.66	0.34	234	17.87	2.09	0.3	0	1	1	0.7
1	65	24.77	IB2	45.3	4.37	2.32	0.31	233	4.369	3.41	0.38	0	1	0	0.7
1	58	21.72	IIA2	41.9	4.43	1.41	0.24	353	1.844	4.21	0.6	0	0	0	0.8
1	62	21.79	IB2	43.6	2.02	0.71	0.18	225	8.054	3.4	0.28	0	0	1	0.7
1	57	21.76	IIA	42.7	4.11	2	0.32	348	8.655	2.94	0.41	0	0	1	0.9
1	54	24.87	IIA	37.4	2.82	0.9	0.36	256	9.94	6.04	1.1	0	0	1	0.6
1	52	21.36		40.9	2.84	1.69	0.25	220	1.18	2.41	0.18	0	0	0	0.4
1	60	22.03	IIA2	46.2	3.27	1.96	0.34	254	9.148	3.35	0.56	0	0	0	0.7
1	65	25.8		45.85	3.08	1.56	0.17	248	7.246	3.68	0.62	0	1	1
1	41	19.72		42.2	4.77	1.15	0.22	242	10.68	2.89	0.35	0	0	1	0.4
1	61	25.54		45.9	3.87	1.47	0.2	227	0.671	1.29	0.28	0	1	1	0.5
1	64	23.98		48.7	4.38	1.13	0.15	304	12.66	3.28	0.55	1	0	0	0.7
